# Supplementary material for: Relative orientation of the carbonyl groups determines the nature of orbital interactions in carbonyl–carbonyl short contacts
Source: Royal Society of Chemistry journal article supplement (doi:10.1039/c8sc04221g), 2018-10-29
Supplement: c8sc04221g2.xlsx [file c8sc04221g2.xlsx]

## Sheet: Motif I (Intermolecular)
CCDC Refcode	O···C Distance	O···C=O Angle	Pyramidality (Θ)	Pyramidality (∆)
	(Å)	(deg)	(deg)	(Å)
ALOXAN11	2.72	105.386	0	0
DUFVAD	2.742	87.081	1.97	0.016
HEQZEK	2.759	104.311	-0.62	-0.005
FANTAQ	2.76	88.718	-2.85	-0.022
DCLBQN01	2.765	95.524	1.14	0.009
TCBENQ18	2.776	99.627	1.66	0.013
BALQUC	2.777	90.732	0.04	0.001
TUFBOM	2.795	96.588	0.08	0.001
BONWAE	2.804	102.206	1.82	0.015
EWERUU	2.81	95.047	0.33	0.003
FOHHAN	2.814	80.545	-0.57	-0.005
QODBOC	2.816	90.154	1.32	0.012
ASUXUH	2.822	91.017	1.03	0.009
COMCIQ	2.823	106.862	1.05	0.008
ZEGFUO	2.834	102.272	2.74	0.022
HOQLEE	2.837	91.039	-1.48	-0.012
EVILIF	2.839	95.58	2.69	0.022
COWDID	2.847	94.585	0.1	0.001
HOQLAA	2.849	92.94	-1.94	-0.016
FIYSAH	2.851	98.327	-0.85	-0.007
ZUXGUW	2.851	95.496	2.24	0.018
GIHXUS	2.853	100.614	0.34	0.002
UPARUZ	2.863	104.111	-0.11	-0.001
ZUHQOI	2.869	88.685	2.11	0.019
HEWTOT	2.875	95.564	1.05	0.008
MEFMER	2.876	100.221	0.06	0.001
JAVMID	2.883	85.454	-0.74	-0.006
CECBAO	2.887	91.99	0.44	0.003
TIYLEU	2.892	99.681	-0.42	-0.004
IYISIT	2.894	99.829	1.59	0.013
HCHXDO	2.896	103.532	0.59	0.006
PAPRIH	2.898	95.855	1.65	0.014
UREJUX	2.898	103.961	0.25	0.002
VAFPID	2.906	114.591	1.18	0.01
WAPFUP	2.914	90.054	0.4	0.004
YIYNUR	2.918	97.677	-0.43	-0.004
WOMSAT	2.923	93.194	0.97	0.008
TUPBEN	2.93	91.881	2.55	0.021
SAWDOL	2.935	103.938	0.14	0.001
TETSUA	2.938	96.265	2.57	0.022
UKEQEH	2.946	95.622	0.55	0.004
LIHMOG	2.954	107.295	1.08	0.009
NUDHUP	2.962	100.89	1	0.008
CERRAT	2.969	95.394	-0.3	-0.003
SAFRIC	2.976	96.339	0.05	0.001
SUZKEE	2.98	83.762	-3.06	-0.024
DERMOC	2.983	88.193	4.37	0.036
TUNZIN	2.989	103.959	-0.58	-0.005
QOPWEY	2.994	92.862	0.68	0.006
SUTXOU	3	93.376	1.97	0.019

## Sheet: Motif II (Intermolecular)
CCDC Refcode	O···C Distance, d1	O···C Distance, d2	O···C=O Angle, θ1	O···C=O Angle, θ2	Pyramidality (Θ1)	Pyramidality (Θ2)	Pyramidality (∆1)	Pyramidality (∆2)
	(Å)	(Å)	(deg)	(deg)	(deg)	(deg)	(Å)	(Å)
JIFRUL	2.816	2.816	88.543	88.543	2.48	2.48	0.02	0.02
LEQWIO	2.833	2.893	86.902	84.244	2.12	-1.05	0.009	-0.018
RIWBOQ	2.846	2.846	86.854	86.854	-0.55	-0.55	-0.005	-0.005
XILBID	2.848	2.848	94.359	94.359	-0.82	-0.82	-0.007	-0.007
BADHUL	2.849	2.849	91.828	91.828	-0.65	-0.65	-0.005	-0.005
NIFHIT01	2.853	2.853	82.705	82.705	0.01	0.01	0	0
YOFQAN	2.855	2.949	90.972	86.461	0.03	0.57	0	0
DEPYEC	2.874	2.874	77.816	77.816	-1.83	-1.83	-0.016	-0.016
XOHHEI	2.887	2.95	88.491	85.533	-0.18	0.07	-0.001	0.002
RIWDAE	2.891	2.891	87.792	87.792	0.78	0.78	0.007	0.007
BASFEI	2.896	2.896	84.056	84.056	-2.3	-2.3	-0.018	-0.018
RIWGAH	2.9	2.9	89.082	89.082	1.47	1.47	0.012	0.012
ROXRON	2.901	2.901	85.356	85.356	-0.04	-0.04	-0.001	-0.001
BASGEJ	2.905	2.905	88.426	88.426	-0.76	-0.76	-0.007	-0.007
LENQOL	2.909	2.909	85.251	85.251	-3.53	-3.53	-0.029	-0.029
OGOGIC	2.91	2.91	88.515	88.515	-0.35	-0.35	-0.003	-0.003
QODLIG	2.914	2.914	88.286	88.286	-0.23	-0.23	-0.002	-0.002
REFGUF	2.917	2.917	94.376	94.376	-1.25	-1.25	-0.011	-0.011
PAGYUS	2.919	2.919	89.233	89.233	0.18	0.18	0.001	0.001
KISJEC	2.92	2.92	89.841	89.841	0.5	0.5	0.004	0.004
VOWYEL	2.92	2.92	81.138	81.138	-0.5	-0.5	-0.004	-0.004
GUNXAP	2.926	2.926	89.684	89.684	3.49	3.49	0.031	0.031
BASGAF	2.927	2.927	85.776	85.776	-0.58	-0.58	-0.005	-0.005
WOXZIU	2.927	2.927	86.978	86.978	0.03	0.03	0.001	0.001
RUCCAV	2.938	2.938	82.607	82.607	-1.66	-1.66	-0.013	-0.013
MONPAH	2.939	2.939	83.324	83.324	0.3	0.3	0.003	0.003
BEPHOV	2.94	2.94	82.971	82.971	-1.88	-1.88	-0.015	-0.015
YUVKOR	2.944	2.944	87.845	87.845	-0.43	-0.43	-0.004	-0.004
IYUCOU	2.945	2.945	86.297	86.297	-4.12	-4.12	-0.034	-0.034
ROXRIH	2.949	2.949	84.903	84.903	-0.88	-0.88	-0.007	-0.007
EDETIR	2.951	2.951	93.073	93.073	-0.84	-0.84	-0.007	-0.007
FEZDAP	2.951	2.951	92.667	92.667	-2.27	-2.27	-0.02	-0.02
CILKEP	2.953	2.953	83.889	83.889	-1.99	-1.99	-0.017	-0.017
RUCBUO	2.953	2.953	82.925	82.925	-1.57	-1.57	-0.013	-0.013
XUQLOL	2.953	2.953	80.404	80.404	0.35	0.35	0.002	0.002
AZIHOG	2.956	2.956	83.03	83.03	1.89	1.89	0.016	0.016
YIDCOD	2.956	2.956	87.425	87.425	-2.5	-2.5	-0.022	-0.022
YUQTIO	2.956	2.956	88.547	88.547	-1.18	-1.18	-0.01	-0.01
YORTUU	2.958	2.958	93.526	93.526	-2.23	-2.23	-0.019	-0.019
BILCUW01	2.96	3.07	89.348	84.106	-0.22	-0.22	-0.002	-0.002
FIDCEA	2.961	2.98	96.335	95.81	7.48	6.18	0.053	0.05
CUPZUJ	2.963	2.982	95.919	94.992	-0.72	-0.72	-0.006	-0.006
PILRAD	2.965	2.965	88.748	88.748	0.11	0.11	0.001	0.001
PNPAUR	2.965	2.965	85.111	85.111	-0.22	-0.22	-0.002	-0.002
VAXGEI	2.967	2.967	89.731	89.731	-0.59	-0.59	-0.005	-0.005
MEXQAJ	2.968	2.968	86.049	86.048	4	4	0.034	0.034
VEJTIN	2.969	2.969	93.266	93.266	-1.31	-1.31	-0.011	-0.011
BASFAE	2.97	2.97	81.075	81.075	3.1	3.1	0.024	0.024
FUMTIS	2.97	2.97	91.67	91.67	-0.98	-0.98	-0.009	-0.009
TEDRUP	2.971	2.971	89.947	89.947	0.13	0.13	0	0

## Sheet: Motif III (intramolecular)
CCDC Refcode	O···C Distance	O···C=O Angle	Pyramidality (Θ)	Pyramidality (∆)
	(Å)	(deg)	(deg)	(Å)
UHISAH	2.543	101.201	2	0.017
IJUTUC	2.565	103.326	4.6	0.038
OSOCOP	2.61	108.419	3.22	0.027
RAKXAD	2.615	100.889	3.8	0.032
IWIGAX	2.622	111.178	6.51	0.052
UVUYUG	2.635	103.414	4.43	0.04
YIVNEX	2.664	102.267	2.9	0.024
FEZNAZ	2.672	109.318	3.2	0.026
ULENII	2.684	104.184	4.2	0.036
SOTVUU	2.705	109.06	3.3	0.027
XIBCAO	2.707	108.815	4.01	0.034
FECHUS	2.712	96.047	3.42	0.029
HINVOR	2.73	110.479	4.43	0.037
DARSAQ	2.755	104.35	1.7	0.014
VUQTEH	2.757	101.586	2.27	0.019
GADBOC	2.775	111.111	3	0.025
KAWSIK	2.781	107.189	2.1	0.019
TECPAU	2.783	109.069	4.27	0.036
GURJAG	2.79	107.091	1.73	0.014
LOSNAI	2.801	101.167	3.7	0.033
ACOGII	2.811	100.75	4.22	0.035
MEANLD	2.823	102.305	2.65	0.022
DICTEO10	2.824	107.203	2	0.017
AJACOD	2.83	105.337	2.16	0.019
NESGOI	2.851	106.406	3.96	0.034
XUKSOL	2.855	113.015	3.1	0.026
DEHCUO	2.864	111.423	-0.22	-0.002
PUZRIN	2.868	113.826	1.51	0.013
ROCNIH	2.868	109.137	3.93	0.032
POXTRA10	2.869	117.109	3.79	0.031
GAMTUL	2.87	102.432	-0.07	-0.001
JEJPEU	2.87	102.008	0.99	0.008
REMBIU	2.875	118.28	2.61	0.022
KOJVIQ	2.887	104.43	4.03	0.033
JIFNIV	2.893	111.852	2.15	0.018
VEHYUC	2.895	109.673	4.13	0.032
LEPDUH	2.896	117.791	2.06	0.017
RIMXES	2.898	108.449	2.73	0.022
CIDJIJ	2.899	109.362	1.78	0.014
JUJGUS	2.899	111.673	-2.05	0.018
JUMCUP	2.91	104.99	3.44	0.029
SUVDOE	2.91	106.966	2.18	0.023
GUPFIH	2.911	112.002	3.85	0.031
CIZZAN	2.912	114.148	1.38	0.012
ONIPIL	2.92	117.123	2.24	0.019
ZIVTAZ	2.921	106.946	2.11	0.018
XETJUC	2.922	100.409	1.48	0.012
ZEDJEZ	2.986	116.343	3.95	0.034
ZILKIO	2.988	113.045	-0.71	-0.006
CEKXIZ	3	93.527	0.33	0.003
OLOBAT	3.01	111.518	1.44	0.013
LOPCOJ	3.02	89.937	2.16	0.018
ETADUZ	3.025	108.734	1.55	0.013
YECNUR	3.043	101.719	1.4	0.012
XAYBOO	3.048	103.606	2.93	0.025
EGUFAN	3.056	110.259	3.25	0.028
ODEKUE	3.06	116.306	-1.77	-0.014
WOMHOV	3.067	104.545	1.53	0.013
ATEXOM	3.07	86.697	-0.23	-0.002
JEXBOE	3.074	107.447	2.65	0.022
QEZWUO	3.076	117.292	4.21	0.035
XEGCIX	3.081	115.955	2.25	0.019
YUGFIP	3.095	114.245	5.64	0.028
ODOFOE	3.1	110.213	0.52	0.004
ZOCLEK	3.11	99.311	3.86	0.031
PAMLAR	3.116	91.489	1.53	0.013
CILPAQ	3.121	114.071	0.79	0.007
HINJAR	3.122	90.382	0.18	0.002
COYHUV	3.126	83.259	-1.81	-0.012
TOBHUP	3.126	100.606	2.53	0.021
NAFWEW	3.129	104.65	1.16	0.01
DARVOH	3.13	89.703	0.99	0.008
ZAPVER	3.13	101.898	2.27	0.019
CANFED	3.136	93.928	0.87	0.007
DAJPEJ10	3.137	103.79	1.47	0.012
ETADOT	3.137	110.003	1.37	0.012
JUTLIT	3.139	89.507	2.24	0.017
PESKUV	3.14	106.38	1.42	0.012
IRUXUP	3.142	127.184	1.66	0.014
YOWFUN	3.145	120.975	1.85	0.015
NUGXOE	3.147	103.19	-2.41	-0.02
NUCZOC	3.149	72.877	-0.49	-0.01
FOXDON	3.149	117.3	4.47	0.038
HURYUP	3.15	123.741	1.85	0.015
GILDUC	3.154	109.731	4.07	0.032
VOPFUB	3.164	119.628	-0.55	-0.005
ODEROE	3.168	120.839	2.18	0.018
SOJRIU	3.17	90.509	-0.99	-0.009
NODXAH	3.174	135.365	-1.06	-0.009
MILNEB	3.176	105.955	2.07	0.018
IKIKUI	3.178	106.103	1.45	0.012
BZCPRO	3.18	132.62	-1.27	-0.01
GICVOE	3.186	97.502	-0.91	-0.008
CEJROZ	3.187	124.838	0.5	0.005
BCPPGA	3.188	132.071	1.1	0.002
LEZLOR	3.19	120.721	-1.49	-0.013
PILJIE	3.193	127.177	-0.7	-0.006
UHUTEY	3.194	122.966	1.24	0.01
ALAGLY	3.195	113.548	0.69	0.006
LUPXIE	3.198	124.709	1.28	0.002
AJOGEL	3.199	130.511	0.01	0
EPOMAY	3.2	120.584	-0.27	-0.003

## Sheet: Motif IV (Intramolecular)
CCDC Refcode	O···C Distance	O···C=O Angle	Pyramidality (Θ)	Pyramidality (∆)
	(Å)	(deg)	(deg)	(Å)
UWABAW	2.445	99.556	5.8	0.048
ODOYAJ	2.454	100.243	7.73	0.065
NUKSUH	2.488	100.701	7.31	0.06
JOFSIH	2.501	103.179	8.32	0.037
TUKSUP	2.552	97.427	4.88	0.041
WALDAQ	2.577	100.764	3.8	0.033
OROWIC	2.602	95.044	2.01	0.017
ASULEG	2.622	98.849	5.3	0.044
BOCNAJ	2.64	100.738	4.45	0.038
PATZER	2.688	102.2	3.83	0.032
FIDROB	2.701	93.445	4.64	0.038
OQEQEH	2.712	97.765	3.31	0.028
TURCIS	2.72	99.261	4.21	0.034
LOLSIQ	2.734	91.315	5.61	0.046
DUHGEU	2.744	102.786	1.9	0.016
ZIZPAB	2.75	99.585	0.07	0.001
BUTHEE	2.758	90.972	4.25	0.035
WOBQUZ	2.763	98.992	3.05	0.025
TUFCAY	2.777	118.654	7	0.057
OPOCAY	2.789	93.632	4.13	0.034
UYOPEE	2.796	97.1	1.96	0.016
COFXUR	2.802	100.626	1.57	0.012
BUWXEY	2.81	102.216	1.95	0.017
UHULEQ	2.815	95.355	4.58	0.039
LANPOG	2.827	102.403	1.59	0.014
DIJSEW	2.84	94.589	3.47	0.028
JAPBAE	2.85	98.885	3.41	0.028
FIBGOO	2.851	83.835	1.23	0.01
DOYGIJ	2.865	80.361	-3.69	-0.03
SEVGUW	2.87	97.656	2.82	0.024
QORQIY	2.88	92.268	2.6	0.022
RIHHEW	2.885	98.82	0.26	0.002
OGUDAX	2.89	94.754	6	0.049
GEJZEC	2.895	97.91	1.15	0.01
OXOZAD	2.902	100.844	1.1	0.009
NIZNER	2.909	96.819	0.08	0
OBEBIG	2.918	96.461	1.6	0.013
SETLOU	2.928	99.917	1.4	0.012
IVIZAO	2.933	90.873	-8.89	-0.072
VARBUL	2.938	99.103	0.72	0.006
BXCPLG	2.947	97.63	1.18	0.009
GACWUE	2.949	96.089	1.9	0.016
UNOLOY	2.957	95.187	2.33	0.019
NIWZUP	2.96	82.084	0.52	0.005
COQKEY	2.965	85.233	-0.49	-0.004
BUBFUZ	2.971	102.354	3.66	0.032
XOJLIT	2.974	103.261	1.49	0.009
ZAYRUM	2.977	95.928	1.96	0.016
WOXZAM	2.98	98.56	1.91	0.016
PAHMES	2.982	91.701	0.76	0.007
ULININ	2.988	98.995	1.18	0.01
PELBOZ	2.995	105.12	0.5	0.004
PIVWIA	3	78.276	-0.14	-0.001
FEFKEI	3.003	95.492	4.31	0.036
XIBMOL	3.012	98.036	2.54	0.021
MOXSOC	3.014	95.124	2.86	0.024
FUJYUF	3.018	95.493	1.03	0.014
DIWLIE	3.023	82.231	3.28	0.03
VOVZEL	3.024	96.002	-0.44	-0.004
AFANIE	3.027	96.752	0.93	0.007
PETRUD	3.028	98.83	-2.81	-0.023
WIMHAC	3.029	96.249	0.42	0.004
GUTFUW	3.03	83.086	0.79	0.007
LETFEX	3.036	102.159	1.48	0.012
OGIVIL	3.037	98.299	-0.66	-0.005
PLBULC	3.041	91.482	1.15	0.01
RIWCIL	3.041	113.037	3.72	0.03
IJUVAK	3.042	108.83	-3.44	-0.029
BOTDAP	3.052	85.18	1.85	0.016
BIBWUE	3.061	101.923	-0.58	-0.005
HEXTOU	3.065	93.856	3.52	0.03
RUFHAD	3.07	90.827	0.67	0.006
YURJUS	3.077	115.942	2.7	0.022
NEWYAP	3.078	120.7	1.39	0.012
BEWQUQ	3.079	91.636	-2.24	-0.018
EVOGOM	3.082	94.306	1.51	0.012
GELZIG	3.083	87.385	3.08	0.015
YOPYAE	3.083	101.094	0.37	0.003
DIYSOU	3.084	89.444	0	0
PIMWAL	3.088	91.363	-0.28	-0.002
INUPTB	3.088	99.692	2.03	0.017
VIMXIY	3.088	96.179	1.97	0.016
VEHRAB	3.089	93.23	2.7	0.023
FAJMUB	3.089	93.445	1.46	0.011
EFOKUG	3.091	94.898	0.28	0.001
GOLNUS	3.093	89.306	1.14	0.002
BULCEQ	3.094	89.716	2.55	0.021
OZIJUD	3.095	92.116	1.87	0.016
FOYTET	3.101	94.978	2.88	0.025
ZACCOV	3.11	101.223	-2.06	-0.018
TIMTAZ	3.12	108.272	1.58	0.013
FRONCX	3.124	97.234	0.06	0
AXBZOP	3.129	92.65	0.18	0.002
AZUPER	3.135	105.144	1.24	0.01
BAXBEI	3.138	86.671	1.43	0.012
WOXZEQ	3.14	97.936	2.63	0.023
GESQAW	3.15	104.314	0.69	0.006
IVOKEK	3.16	88.338	1.65	0.013
KAKDUV	3.17	81.967	-0.25	-0.002
GUFJEY	3.181	123.963	2.62	0.021
ZUXQIU	3.187	80.705	0.41	0.003
OWUSEF	3.195	90.647	1.35	0.011
JOSWAP01	3.197	89.39	0.07	0.001
BOPBEN	3.2	90.633	-1.67	-0.014

## Sheet: Motif V (Intramolecular)
CCDC Refcode	O···C Distance, d1	O···C Distance, d2	O···C=O Angle, θ1	O···C=O Angle, θ2	Pyramidality (Θ1)	Pyramidality (Θ2)	Pyramidality (∆1)	Pyramidality (∆2)
	(deg)	(deg)	(Å)	(Å)	(deg)	(deg)	(Å)	(Å)
FEDNEH	2.575	2.982	96.245	77.07	6.84	2.13	0.04	0.01
YUJJIY	2.601	2.995	97.159	78.703	2.58	2.08	0.022	0.017
KUBDUG	2.649	2.885	86.433	75.721	1.8	1.06	0.014	0.009
DACVUA	2.672	2.987	95.14	80.275	-1.89	1.04	-0.016	0.008
DABPAZ	2.727	2.918	79.835	71.441	-0.8	1.17	-0.006	0.009
YUHHUG	2.735	2.969	91.563	80.841	3.04	-0.73	0.026	-0.006
DEYNEA	2.739	2.991	89.533	78.061	0.58	1.27	0.005	0.011
FIFXAT	2.74	2.979	89.124	78.385	5.82	-0.67	0.047	-0.005
ASOLOK	2.752	2.931	90.522	82.327	2.55	1.14	0.021	0.01
KIDCEF	2.764	2.983	87.961	78.082	0.95	-4	0.034	-0.008
VEQRUG	2.769	2.957	92.07	83.234	1.06	-0.22	0.009	-0.002
EYICIZ	2.774	2.937	89.297	81.77	0.92	0.98	0.007	0.008
TIKKEF	2.778	2.971	85.904	77.283	-0.89	0.33	-0.007	0.003
GORBEU	2.79	2.991	85.6	76.583	5.68	0.17	0.046	0.002
UGILAY	2.793	2.995	83.988	74.98	0.07	1.68	0.002	0.013
YAHMOL	2.805	2.901	91.76	87.559	4.48	-2.75	0.036	-0.022
AYATOK	2.809	2.96	77.642	70.976	7.16	4.44	0.059	0.04
KOXDUY	2.81	2.958	91.575	84.946	-0.42	2.7	-0.004	0.021
BECLAW	2.816	2.896	85.322	81.28	0.62	-6.53	-0.006	0.054
LIQYUF	2.818	2.999	90.159	81.87	0.49	-0.22	0.004	-0.002
GAWGES	2.822	2.93	82.792	78.11	3.47	1.43	0.029	0.012
GULROW	2.824	2.876	81.845	79.513	4.58	0.01	0.037	0
LAMYEE	2.832	2.94	95.171	89.888	3.26	-0.65	0.027	-0.005
CIRGUH	2.836	2.92	86.882	83.4	0.09	0.51	0.001	0.005
ZITZAF	2.847	2.922	79.941	76.656	-1.89	-1.4	-0.016	-0.012
LEBRER	2.861	2.857	77.303	77.584	2.45	0.67	0.005	0.021
MERDUJ	2.876	2.974	88.547	83.974	0.12	-0.22	0.001	-0.002
OCALIP	2.883	2.883	87.403	87.403	1.07	1.07	0.009	0.009
DIZXAN	2.891	2.992	88.182	83.993	-0.16	0.98	-0.001	0.008
SIJLUS	2.894	2.936	82.521	80.118	2.97	1.6	0.025	0.013
KUMSOC	2.9	2.9	80.444	80.444	3.72	3.72	0.031	0.031
KOSZAT	2.903	2.903	92.053	92.053	1.95	1.95	0.015	0.015
VAMLIG	2.91	2.984	100.92	97.931	3.09	0.23	0.002	0.024
NUGZAR	2.917	2.923	88.207	87.993	5.02	-6.91	0.04	-0.056
CUBHUE	2.925	2.955	86.029	84.789	-2.66	1.4	-0.022	0.012
DASKEO	2.93	2.939	84.756	84.378	-1.53	4.48	-0.037	0.012
GUCPEA	2.936	2.631	78.309	92.605	2.21	5.93	0.019	0.049
WEPHOP	2.946	2.93	86.424	87.363	1.69	-1.36	0.014	-0.011
XUYTAO	2.957	2.953	81.442	81.977	-1.71	0.87	-0.014	0.008
QACFAB	2.962	2.96	84.501	84.393	2.96	4.69	0.024	0.038
BATJUD	2.965	2.989	80.719	79.786	2.39	0.15	0.019	0.002
YEXQIC	2.97	2.991	88.909	88.466	-1.36	0.41	-0.003	0.011
POYLUL	2.978	2.772	81.306	90.829	1.24	-2.24	0.01	-0.019
FOVWIX	2.983	2.794	81.302	89.902	3.13	2.48	0.025	0.02
TAKMIB	2.986	2.903	84.435	88.355	0.62	1.7	0.005	0.015
LUHCEY	2.988	2.961	82.936	84.368	-1.49	2.92	-0.012	0.025
BODVEX	2.99	2.913	85.384	88.969	-0.14	1.32	-0.001	0.011
JADTUG	2.993	2.988	87.106	87.296	1.76	0.87	0.015	0.007
CACDEQ	2.995	2.995	85.914	86.509	1.15	-3.05	0.01	-0.01
SOLMIQ	2.998	2.954	87.202	89.544	0.51	-1.61	0.004	0.014

## Sheet:  Motif VI (Intermolecular)
CCDC Refcode	O···C Distance	O···C=O Angle	Pyramidality (Θ)	Pyramidality (∆)
	(Å)	(deg)	(deg)	(Å)
RAVYAR	2.733	67.936	-0.04	0
KEXJII	2.749	63.84	-0.37	-0.004
MUMZEA	2.804	74.225	0.03	0
MAPGOZ	2.863	69.884	1.07	0.009
OJAJEQ	2.865	79.399	0.02	0
KEMZIL01	2.866	80.19	2.42	0.016
UGUMUE	2.876	50.833	0.43	0.003
XODSIU	2.879	79.69	-0.01	0
IURACL14	2.885	52.409	-0.23	-0.002
DUBNUL	2.89	80.749	-0.08	0
ZOYLII01	2.9	54.002	1	0.009
IURACL11	2.925	52.264	1.06	0.008
DCPYZO	2.925	64.696	-0.94	-0.008
IURACL13	2.926	52.386	0.21	0.001
SUXKON	2.948	69.391	1.68	0.015
QUYTOU	2.965	78.942	0.01	0
IURACL10	2.982	54.046	-4.13	-0.033
BABWEG	3.002	69.398	-0.11	-0.001
BABWEG10	3.002	69.389	-0.11	-0.001
ZUGRIC	3.005	67.77	0.83	0.007
CEGFIF	3.01	77.764	-0.04	0
EWITUB	3.016	83.825	0.09	0
BRGUOS01	3.026	68.832	0.46	0.004
CUMYUF	3.027	55.906	1.89	0.017
XAYLIV	3.031	72.53	-0.02	-0.001
CUTVAO	3.031	68.851	-0.37	-0.004
GESNUP	3.038	78.537	-0.08	0
RICVOP	3.044	73.765	0.05	0
URELAF	3.062	82.478	0.03	0
SINMOS	3.062	71.141	-0.57	-0.005
JIJXUV	3.066	75.522	-0.01	0
COXNEI	3.066	68.162	0.16	0.001
SAYZIC	3.068	79.984	-4.14	-0.032
SODCOF	3.069	58.039	0.22	0.002
MANGEO	3.086	76.153	-4.74	0.04
COSJIE	3.124	70.742	1.7	-0.014
PIGYEL	3.124	73.908	-0.33	-0.003
WISXIH	3.134	76.167	-0.68	-0.006
GULVEO	3.135	68.523	-1.06	-0.008
BIBQUZ	3.135	64.578	0.37	0.003
AGOLEN	3.141	81.226	2.93	0.024
UXIYOQ	3.152	63.604	1.56	0.012
BETNET	3.166	61.953	1.85	0.015
FIQMOH	3.168	74.42	-1.15	-0.009
FEFKIN	3.179	91.737	0.01	0
LUXSAY	3.182	91.34	-3.61	-0.028
DETBOT	3.191	76.701	-0.02	0
PIXCOQ	3.192	70.658	0.9	0.011
